# Supplementary material for: Production cross sections of isomers in As, Y, In, and Hf with 14.8-MeV neutrons
Source: MDPI journal article supplement (doi:10.3390/membranes11090715), 1973-06-01
Supplement: s1 [file s1]

SUPPLEMENTARY INFORMATION:

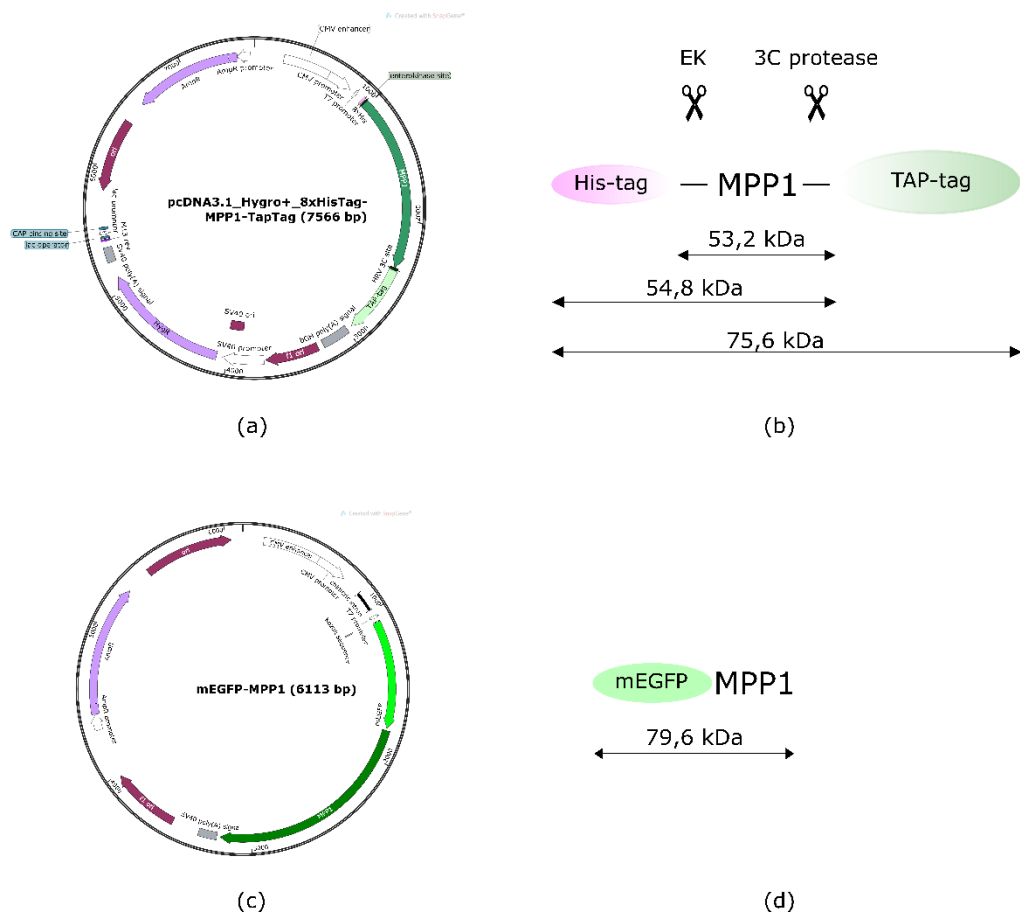

**Figure S1. Plasmid maps and recombinant protein schemes** (a) Map of a pcDNA3.1\_Hygro+\_8xHisTag-MPP1-Tap-tag plasmid vector used to overexpress recombinant MPP1 protein shown schematically on (b) with indicated proteases recognition sites. (c) Map of an mEGFP-MPP1 plasmid vector used to overexpress recombinant mEGFP-MPP1 protein shown schematically on (d).

**Table S1.** Primers used for cloning and mutagenesis

| Primer        | Sequence (5' --> 3')    |             |
|---------------|-------------------------|-------------|
| MPP1-XhoI-Fwd | TCGCTCGAGATGACCCTCAAGG  | Cloning     |
| MPP1-NotI-Rev | ATTGCGGCCGCTTAGTAAACCCA | Cloning     |
| MPP1ΔACP-Fwd  | CATCATCACCACCACCAC      | Mutagenesis |
| MPP1ΔACP-Rev  | CATGGATCCGAGCTCGGT      | Mutagenesis |

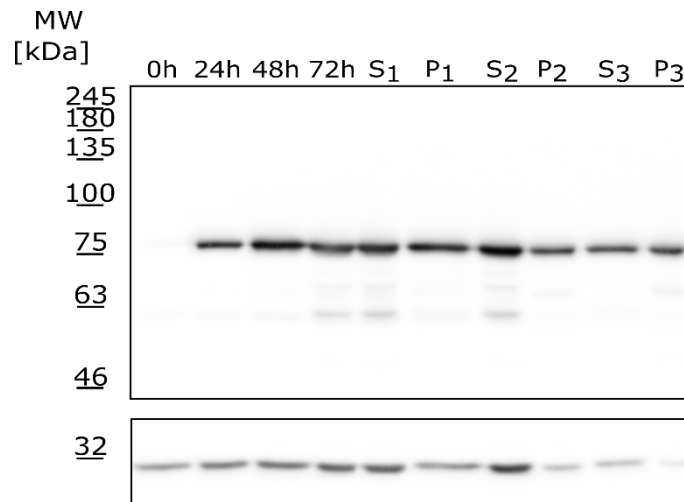

**Figure S2. Expression and fractionation of MPP1 protein from HEK-293F cells.** Western Blot analysis of the crude cell lysates collected through transfection (0h-72h) and samples at each step of fractionation (S1-P3; S – supernatant, P – pellet, 1-3 – number of centrifugations: 1) 1000 x g, 10 min; 2) 250 000 x g, 50 min; 3) 250 000 x g, 50 min). The upper membrane was incubated with anti-His-tag antibodies to detect overexpressed MPP1 and the lower membrane with anti-GAPDH antibodies;
